# Supplementary material for: An AIEE Active Anthracene-Based Nanoprobe for Zn2+ and Tyrosine Detection Validated by Bioimaging Studies
Source: MDPI journal article supplement (doi:10.3390/chemosensors10100381), 2022-09-22
Supplement: s1 [file s1]

Archive with 1 entries (1 files):
- chemosensors-1908363-supplementary (Final).pdf
